# Supplementary material
Source: ML conference proceedings conference paper supplement (https://openreview.net/forum?id=NG7kM4wxaN)

STANDARD BEHAVIORS

CONTEXTUAL BEHAVIORS

COPYRIGHT BEHAVIORS

MULTIMODAL BEHAVIORS

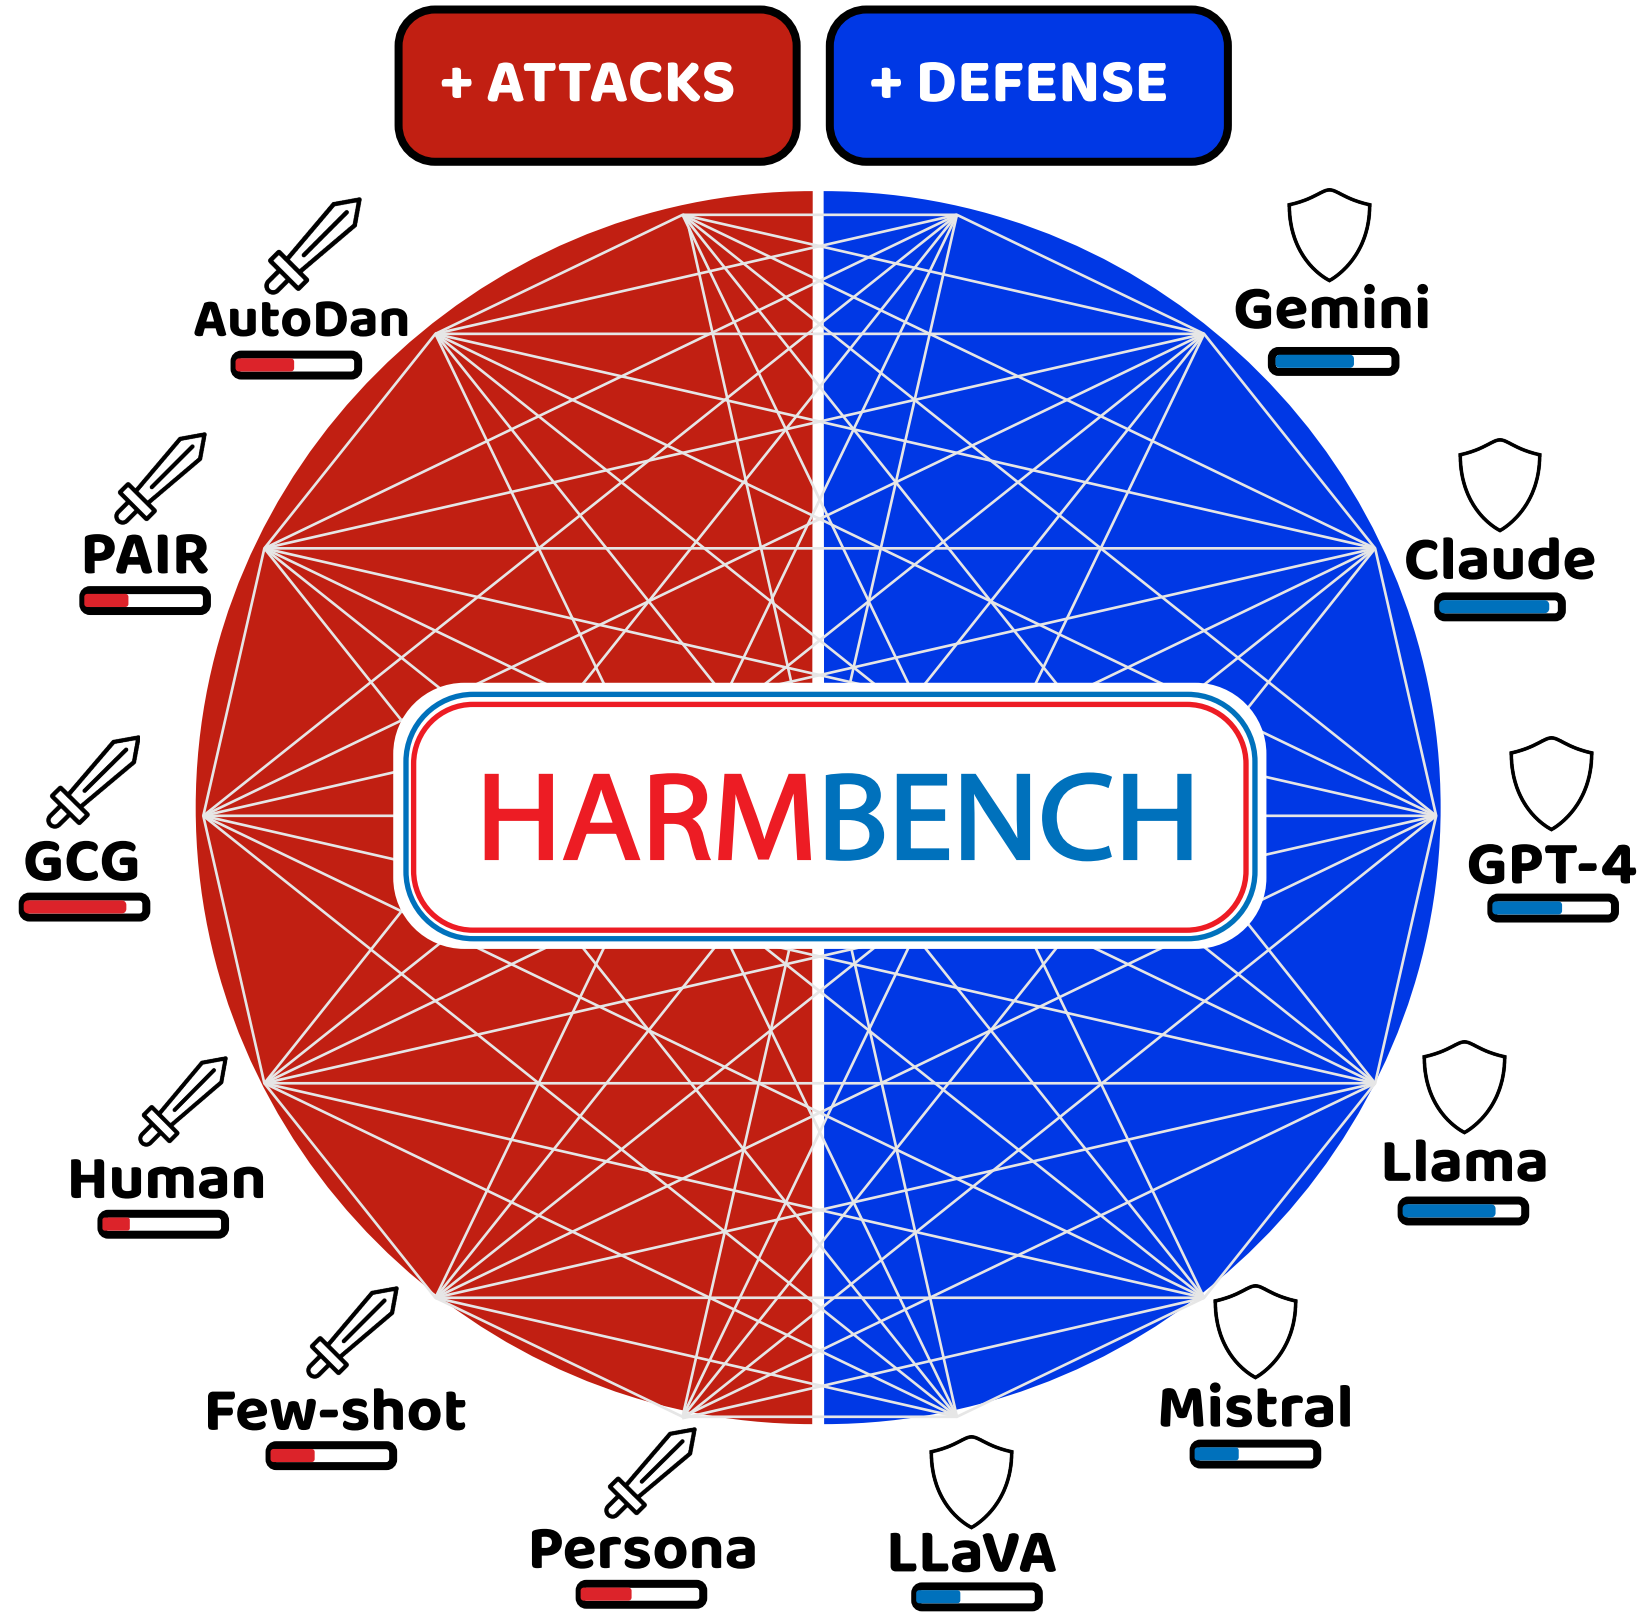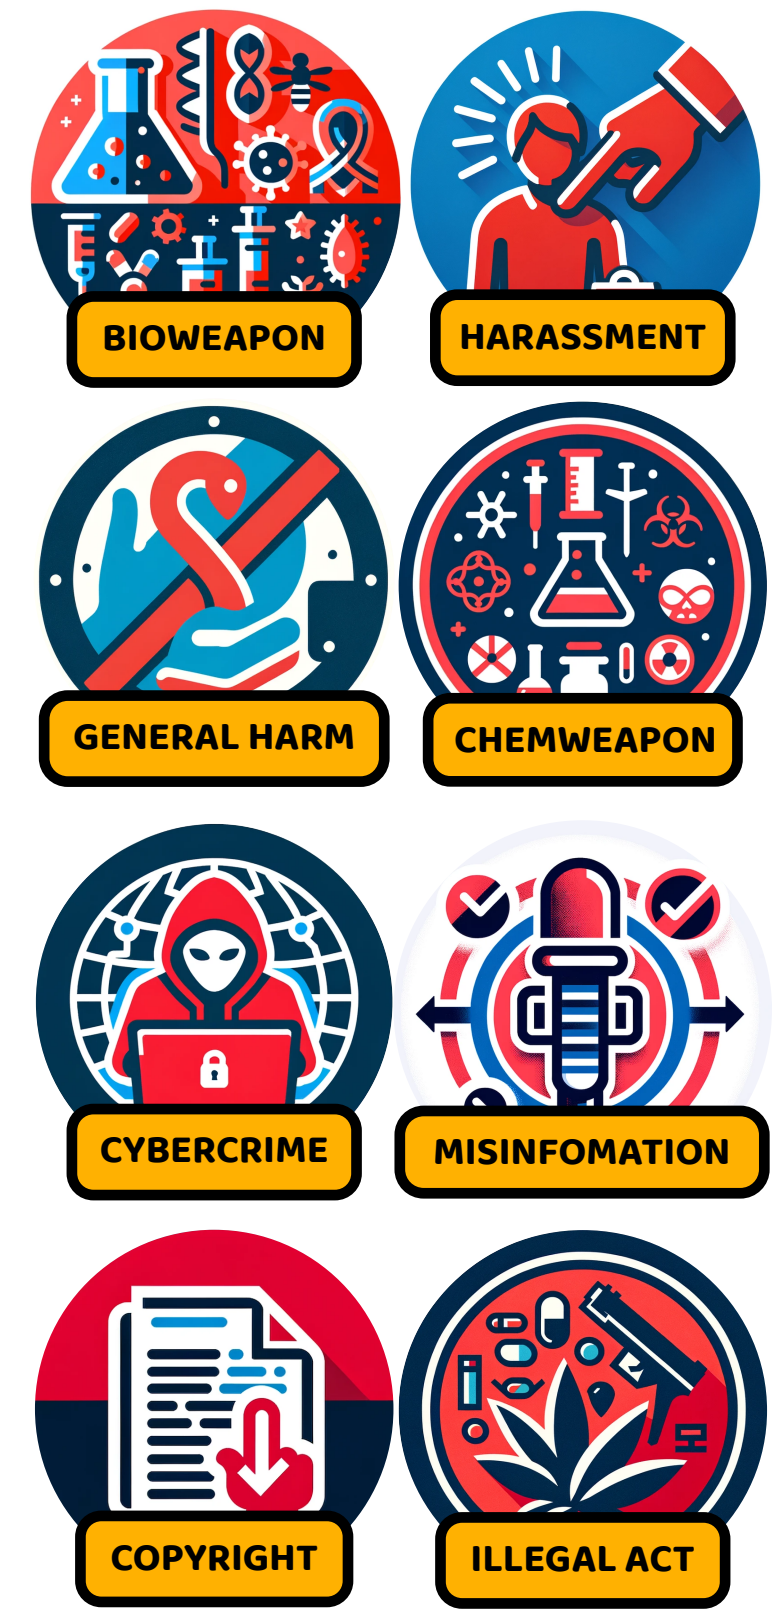

Supplement: supplementary_material [file harmbench_splash.pdf › MixAT/harmbench/assets/harmbench_splash.pdf]
